# Supplementary material for: Promotional effect and mechanism study of nonmetal-doped Cr/CexTi1−xO2 for NO oxidation: tuning O2 activation and NO adsorption simultaneously
Source: Royal Society of Chemistry journal article supplement (doi:10.1039/c6ra01928e), 2016-01-01
Supplement: c6ra01928e1.pdf [file c6ra01928e1.pdf]

## Supporting information

### **Promotional Effect and Mechanism Study of nonmetal-doped Cr/Ce<sub>x</sub>Ti<sub>1-x</sub>O<sub>2</sub> for NO Oxidation: Tuning O<sub>2</sub> Activation and NO Adsorption Simultaneously**

Lei Zhong<sup>a,c</sup>, Qin Zhong<sup>a,b,c\*</sup>, Wei Cai<sup>b,c</sup>, Shen Zhang<sup>b</sup>, Yang Yu<sup>b,c</sup>, Man Ou<sup>b,c</sup>, Fujiao Song<sup>b,c</sup>

- a. School of Environmental and Biological Engineering, Nanjing University of Science and Technology, Nanjing 210094, PR China;*
- b. School of Chemical Engineering, Nanjing University of Science and Technology, Nanjing 210094, PR China;*
- c. Nanjing AIREP Environmental Protection Technology Co., Ltd, Nanjing, Jiangsu 210091, PR China*

\* Corresponding author, Tel.: +86 25 84315517, fax: +86 25 84315517, E-mail: zq304@mail.njust.edu.cn.

## 1. Experimental

The N-CeO<sub>2</sub>, N-TiO<sub>2</sub> and N-CeTi samples were prepared by the sol-gel method for the confirmation of doping sites.

Synthesis of N-CeO<sub>2</sub>. 0.0352 mol Ce(NO<sub>3</sub>)<sub>3</sub>·6H<sub>2</sub>O was added to 0.0704 mol of acetylacetonone (C<sub>5</sub>H<sub>8</sub>O<sub>2</sub>) under continuous stirring. Then, 0.0422 mol cyanamide (CH<sub>2</sub>N<sub>2</sub>) was diluted with 50 mL ethanolic solution at 50 °C and then was added dropwise into the above solution. After stirring evenly, the solution was heated at 80 °C for 4 h in a water bath and dried at 120 °C for 6 h. Then the dried material was calcined in flowing air at 550 °C for 5 h at a heating rate of 2 °C/min.

Synthesis of N-TiO<sub>2</sub>. 0.0352 mol tetrabutyl titanate (C<sub>16</sub>H<sub>36</sub>O<sub>4</sub>Ti) was added to 0.0704 mol of acetylacetonone (C<sub>5</sub>H<sub>8</sub>O<sub>2</sub>) under continuous stirring. Then, 0.0422 mol cyanamide (CH<sub>2</sub>N<sub>2</sub>) was diluted with 50 mL ethanolic solution at 50 °C and then was added dropwise into the above solution. After stirring evenly, the solution was heated at 80 °C for 4 h in a water bath and dried at 120 °C for 6 h. Then the dried material was calcined in flowing air at 550 °C for 5 h at a heating rate of 2 °C/min.

Synthesis of N-CeTi. 0.0176 mol tetrabutyl titanate (C<sub>16</sub>H<sub>36</sub>O<sub>4</sub>Ti) and 0.0176 mol Ce(NO<sub>3</sub>)<sub>3</sub>·6H<sub>2</sub>O were added to 0.0704 mol of acetylacetonone (C<sub>5</sub>H<sub>8</sub>O<sub>2</sub>) under continuous stirring. Then, 0.0422 mol cyanamide (CH<sub>2</sub>N<sub>2</sub>) was diluted with 50 mL ethanolic solution at 50 °C and then was added dropwise into the above solution. After stirring evenly, the solution was heated at 80 °C for 4 h in a water bath and dried at 120 °C for 6 h. Then the dried material was calcined in flowing air at 550 °C for 5 h at a heating rate of 2 °C/min.

## 2. Supplementary Figures

Specific surface areas of the different catalysts were determined by N<sub>2</sub> adsorption-desorption measurements at 77 K by employing the Brunauer-Emmet-Teller (BET) method (Gold App V-sorb 2800), and the total pore volume and pore size of the samples were calculated by Barrett-Joyner-Halenda (BJH) method.

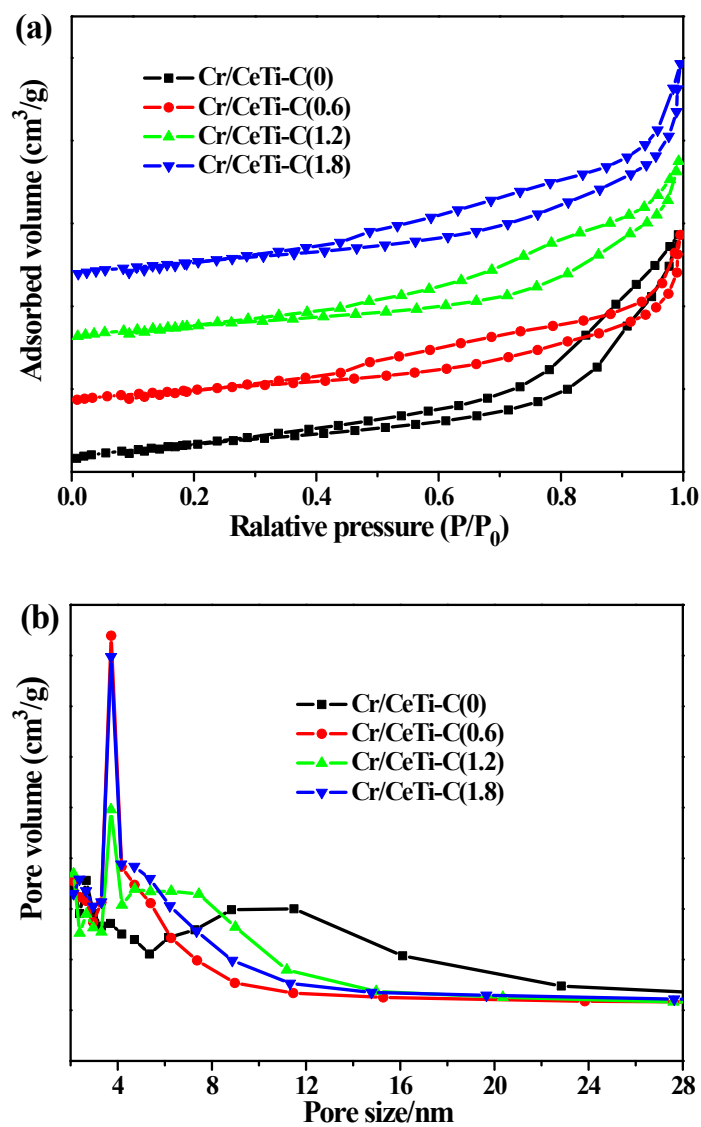

Fig. S1 N<sub>2</sub> adsorption-desorption isotherms (a) and BJH pore distribution curves (b) of the Cr/CeTi-C(x) catalyst.

Table S1 Physical properties of the Cr/CeTi-C(x) catalysts.

| Sample       | Surface area (m <sup>2</sup> /g) <sup>a</sup> |                       | Pore volume                         | Pore diameter <sup>b</sup> |
|--------------|-----------------------------------------------|-----------------------|-------------------------------------|----------------------------|
|              | A <sub>BET</sub>                              | A <sub>Langmuir</sub> | V <sub>p</sub> (mm <sup>3</sup> /g) | D <sub>p</sub> (nm)        |
| Cr/CeTi-C(0) | 24.8                                          | 33.6                  | 96.3                                | 9.0                        |

|                |      |      |      |     |
|----------------|------|------|------|-----|
| Cr/CeTi-C(0.6) | 19.7 | 26.6 | 78.6 | 7.2 |
| Cr/CeTi-C(1.2) | 18.1 | 24.7 | 74.9 | 7.0 |
| Cr/CeTi-C(1.8) | 21.5 | 29.3 | 93.8 | 7.7 |

<sup>a</sup> Surface areas calculated by the BET method and Langmuir method.

<sup>b</sup> Pore sizes obtained from the N<sub>2</sub> adsorption isotherms by the BJH method.

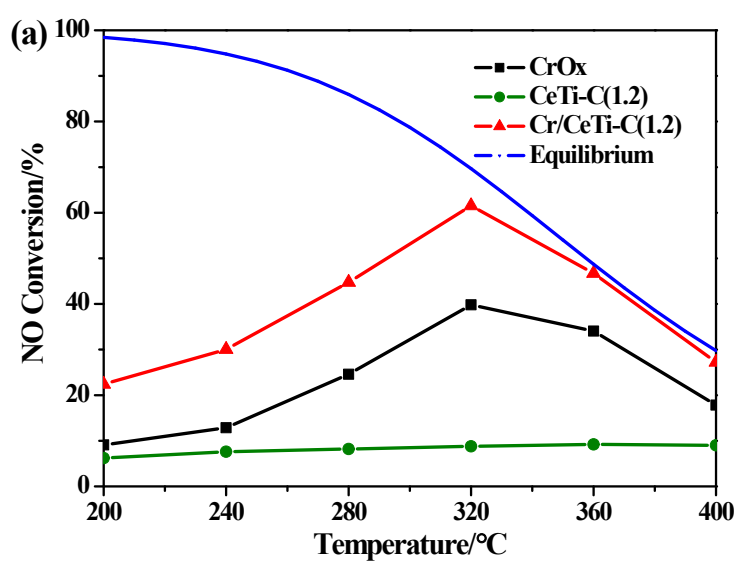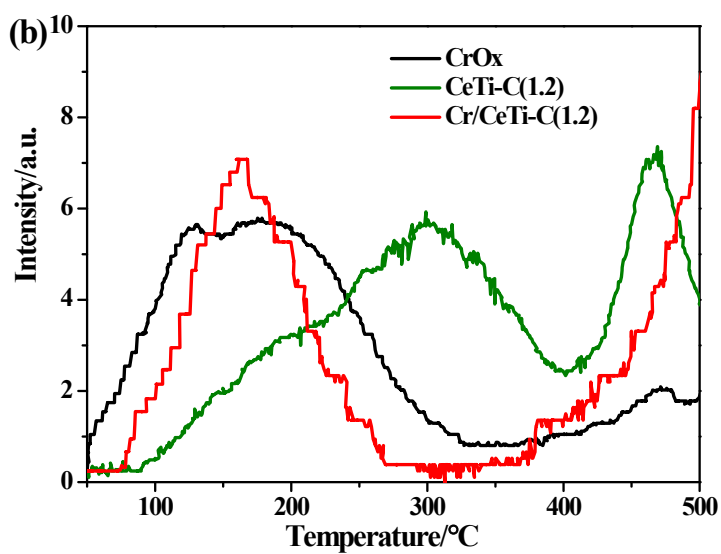

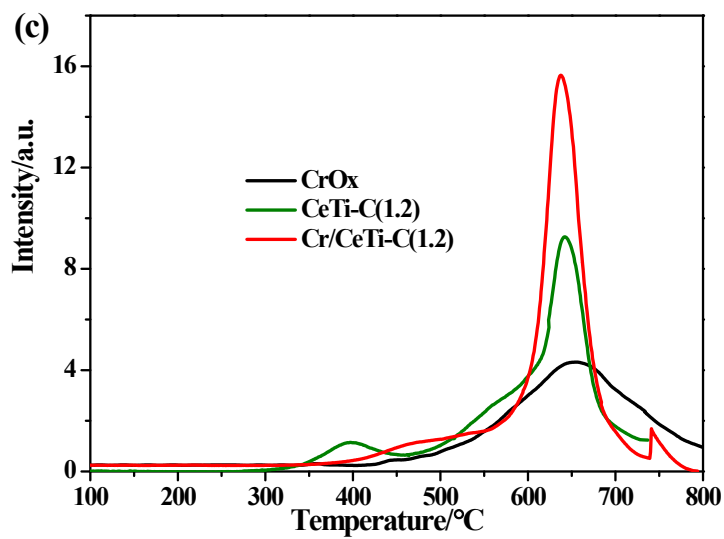

Fig. S2 The NO conversion (a), NO-TPD profiles (b) and O<sub>2</sub>-TPD profiles (c) of the CrO<sub>x</sub>, CeTi-C(1.2) and the Cr/CeTi-C(1.2) samples.

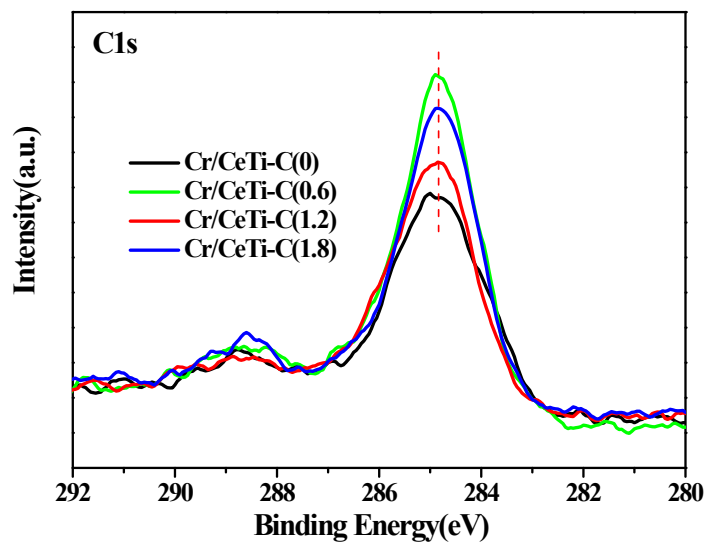

Fig. S3 High resolution XPS spectra of C1s for four Cr/CeTi-C(x) catalysts.
